# Supplementary material
Source: Atypon-hosted journal article supplement (https://563.library.nashville.org/Record/CARL0000471398/DownloadSupplementalFile?fileId=57)
Supplement: DownloadSupplementalFile [file DownloadSupplementalFile]

**Sports and Recreation Ephemera Subject Files**  
**1887-2011**  
**(bulk 1980-2011)**

**Collection Summary**

**Creator:** Intentionally assembled by Special Collections Division staff, beginning at an unknown date, probably in the late 1960s, and collected on an ongoing basis.

**Title:** Sports and Recreation Ephemera Subject Files

**Inclusive Dates:** 1887-2011 (bulk 1980-2011)

**Summary/Abstract:** Includes a wide variety of material relating to professional, amateur and recreational sports, and related subjects.

**Physical Description/Extent:** .25 cu. ft.

**Language:** In English.

**Stack Location:** Closed stacks workroom; closed stacks map room oversize ephemera subject files

**Repository:** Special Collections Division, Nashville Public Library, 615 Church St., Nashville, TN 37219

**Scope and Contents of the Collection**

Includes a wide variety of material relating to professional, amateur and recreational sports, individual sports teams, general sports activities (mostly for adults), seasonal and other recreational activities, amusement parks and similar location-based recreation, marathons and single-event sports, sports stadiums and venues, and related subjects. Formats include promotional material, programs, recreation guides, registration or sign-up materials, advertisements, tickets, posters, rosters, season schedules, and other materials. Quantity of materials ranges from a single item to several folders. Most folders contain less than five items, and often only a single item. Some items are photocopies.

Some of the more notable material includes several items from the Opryland U.S.A. themepark; items from the Nashville Sounds baseball team while they played at Greer Stadium; a recollection by James Hendrix about Tom Wilson, notable baseball figure in the Negro Leagues; a few items about the Iroquois Steeplechase and the Country Music Marathon; and a wide variety of other materials and subjects.

**Organization/Arrangement of Materials**

Organization: Alphabetical by sport.

**Restrictions**

**Restrictions on Access:** In library use only. Available by appointment.

**Restrictions on Use and Reproduction:** Some items may be restricted by copyright law or donor restriction.

## **Index Terms**

### **Personal Names:**

Wilson, Thomas T., d. 1947

### **Corporate Names/Organizations:**

Nashville Predators (Hockey team)

Nashville Sounds (Baseball team)

Opryland U.S.A.

Tennessee Titans (Football team)

### **Meeting Name:**

Country Music Marathon (Nashville, Tenn.)

Iroquois Steeplechase (Nashville, Tenn.)

### **Subjects:**

Amusement parks – Tennessee – Nashville

Aquatic sports – Tennessee – Nashville

Baseball – Tennessee – Nashville

Charity sports events – Tennessee – Nashville

Entertainment events – Tennessee – Nashville

Family recreation – Tennessee – Nashville

Fishing – Tennessee

Football teams – Tennessee – Nashville

Hockey teams – Tennessee – Nashville

Leisure – Tennessee – Nashville

Marathon running – Tennessee – Nashville

Minor league baseball – Tennessee – Nashville

Negro leagues – Tennessee – Nashville – History

Outdoor recreation – Tennessee – Nashville

Professional sports – Tennessee – Nashville

Recreation – Tennessee – Nashville

Sports – Tennessee – Nashville

Sports facilities – Tennessee – Nashville

Sports in popular culture – United States

Sports teams – Tennessee – Nashville

Steeplechasing – Tennessee – Nashville

Team sports

### **Places:**

Nashville (Tenn.) – History – Sources

Nashville (Tenn.) – Social life and customs

### **Genre/Document Types:**

Advertisements

Fliers (printed matter)

Manuscripts (document genre)  
Posters  
Programs (documents)  
Schedules (time plans)  
Tickets

**Occupations:**

Professional athletes

**Added Author (Personal Names):**

Hendrix, James

**Added Author (Corporate Headings):**

Nashville Predators (Hockey team)  
Nashville Sounds (Baseball team)  
Opryland U.S.A.  
Tennessee Titans (Football team)

**Associated and Related Material**

Related materials may be found elsewhere in the Ephemera Subject Files under Biography (for individual sports figures); Schools (for high school and college sports); Organizations (particularly for charitable sports or recreational events as fundraisers); and Fairs, Festivals and Events.

Two maps of Opryland U.S.A. themepark are part of the Nashville Room Map Collection; see reference to specific location in inventory, below.

**Separated Material**

Some items may have been separated for storage to an oversize box, drawer, or the Nashville Room Photographs Collection. Separation notices have been used to indicate such removals.

**Administrative Information**

**Copyright:** This material may be protected by copyright law (Title 17 U.S. Code)

**Preferred Citation:** [folder title or item description], [category name], Sports and Recreation Ephemera Subject Files, Special Collections Division, Nashville Public Library.

**Processing Information:** Weeded by staff members Linda Barnickel and Carol Kaplan, 2003. Rehoused and reprocessed by staff member Linda Barnickel, 2008; additions 2015. All actions part of overall ephemera subject files reprocessing project.

**Accruals:** Additional accruals are expected.

## Detailed Description of the Collection

In general:

*Sports Nashville* magazine, 2005

Amusement Parks (2 folders):

1. Brochures:

Family Golf Center at Hickory Hollow, 2007

Nashville Shores, 2007

2. Opryland U.S.A.

Bag with logo, n.d.

Opryland '78 show guide

"So Much That's New This Year," 1995

Grand Ole Opry Sightseeing Tours, ca. 1996

Opryland U.S.A. General Jackson showboat, 1996

Oversize:

Map Drawer B-3 (Part of Nashville Room Map Collection): Two maps, 1972; 1978

Baseball

Negro Leagues

"I Remember Tom" [Wilson] by James Hendrix, 1983

Outlaws

Brochure and pocket schedule, 2010

Sounds (4 folders):

1. Programs, 1978-1979

2. Program, lineup, brochure, 1981

3. Pocket schedules, 2005-2012 (incomplete)

4. Program, roster, coloring page, 2010

Vols

Oversize box 2, folder 9: Poster (reproduction): Nashville Vols, 1940 Southern Association Champions

Bicycling

Harpeth River Ride and Harpeth Bicycle Club, 2010

Oversize box 2, folder 9: Tour de Nash posters, 2007, 2009

Fishing

"Fishing Guide to the Great Lakes of Tennessee," 1951

Football

In general

Oversize box 2, folder 14: "Football Preview" (high school & college teams), *Nashville Banner* newspaper, 1956

Kats

Pocket schedule, 2007

Music City Bowl

Brochure, 10<sup>th</sup> anniversary, 2007

Titans

Pocket schedules, 2007-2008;

preseason ticket v. New Orleans Saints, featuring photograph of Michael Roos (#71), 2010

Oversize box 2, folder 9: Poster, team players, 2008

Golf

Brochures, SpringHouse Links, ca. 2007; Gaylord Springs, ca. 2009

Hockey

Predators

Programs: vs. Chicago Blackhawks, 2010; "Unmasked Ball," 1999

Oversize drawer BB-1, folder 10: Poster, Predators Dancers and Goal Girls, ca. 2007

Racing – Auto

Music City Raceway tickets & Fairgrounds Speedway flyer, 2010

Racing – Horse (2 folders):

1) Program from races at West Side Park (photocopy), 1887

2) Iroquois Steeplechase, 1982-1991

Media Guides, 1989, 1991

41<sup>st</sup> Anniversary booklet, (1941-1982)

Running (2 folders):

1) Marathons, various brochures, 2007-2011

2) Marathons – Country Music Marathon, event guides, misc. 2007-2010

Soccer

Flyer, effort to obtain World Cup event for Nashville, ca. 2006

Water sports

"First Annual Regatta," Nashville Boat Racing Club, 1947

Winter sports

Ski and snowboard racing, Nashville Ski Club, 2007
